# Supplementary material for: Vitamin-Containing Antioxidant Formulation Reduces Carcinogen-Induced DNA Damage through ATR/Chk1 Signaling in Bronchial Epithelial Cells In Vitro
Source: MDPI journal article supplement (doi:10.3390/biomedicines9111665), 2021-11-11
Supplement: s1 [file s1]

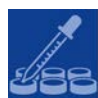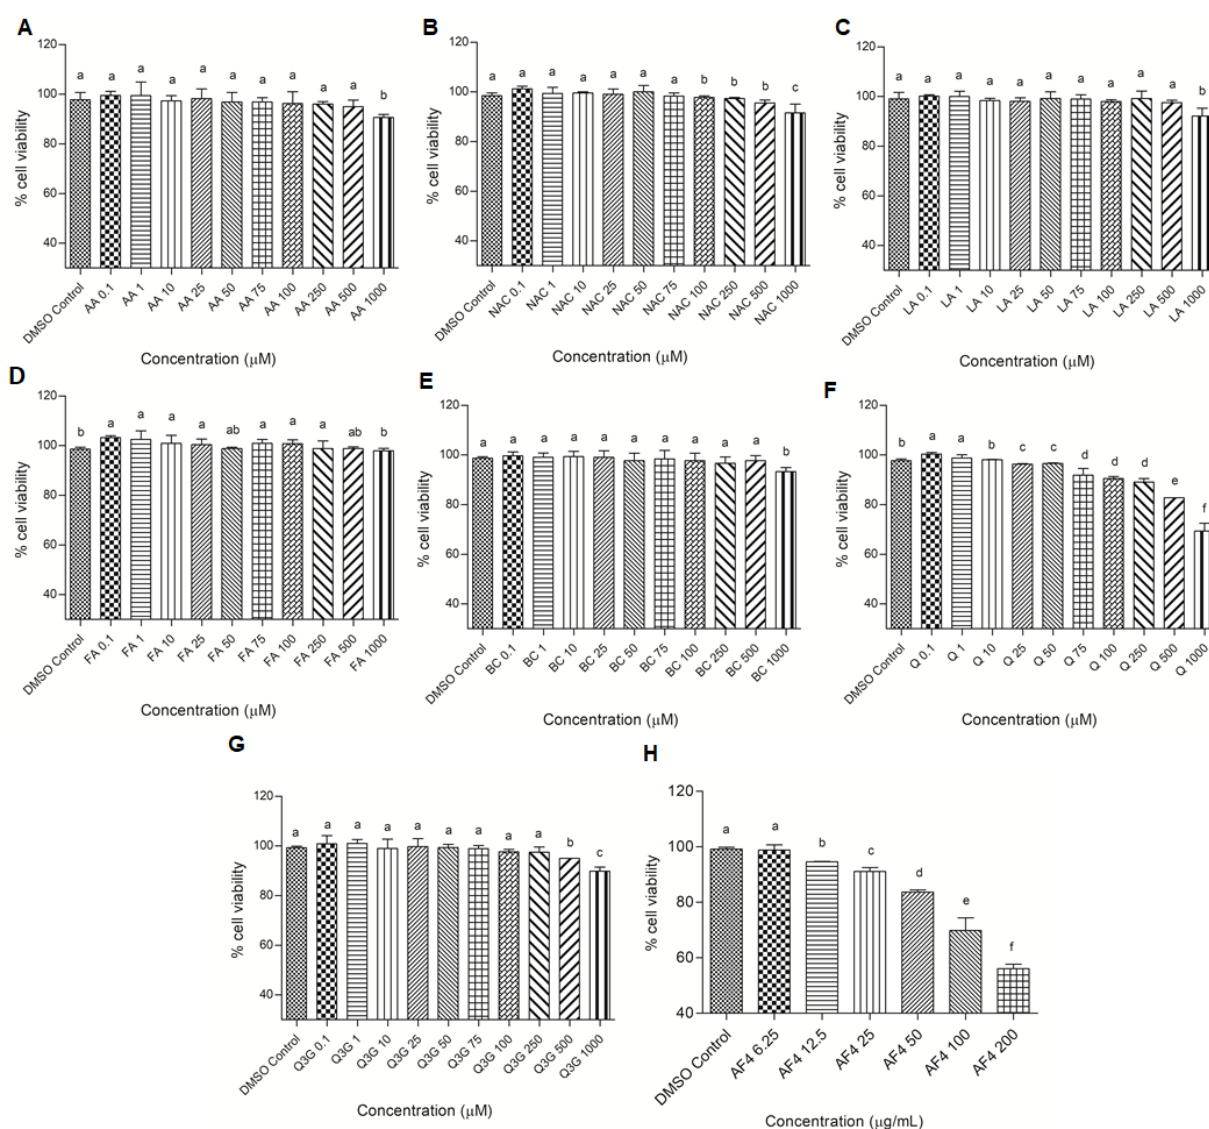

**Figure S1.** (A–H): The cell viability of Antioxidant components, Q, Q3G & AF4 on BEAS-2B cells after 24 h treatment. Experimental values presented as mean  $\pm$  SD of  $n = 3$  independent experiments by One Way Analysis of Variance was performed with Tukey's pairwise comparison. Means that share the same letter are not significantly different at  $p \leq 0.05$ . Abbreviation; AA: Ascorbic acid, AF4: apple peel flavonoid fraction 4, BC: β-carotene, FA: folic acid, LA: α-lipoic acid, NAC: N-acetyl cysteine, Q: quercetin, Q3G: Q-3-O-d-glucoside (Q3G).

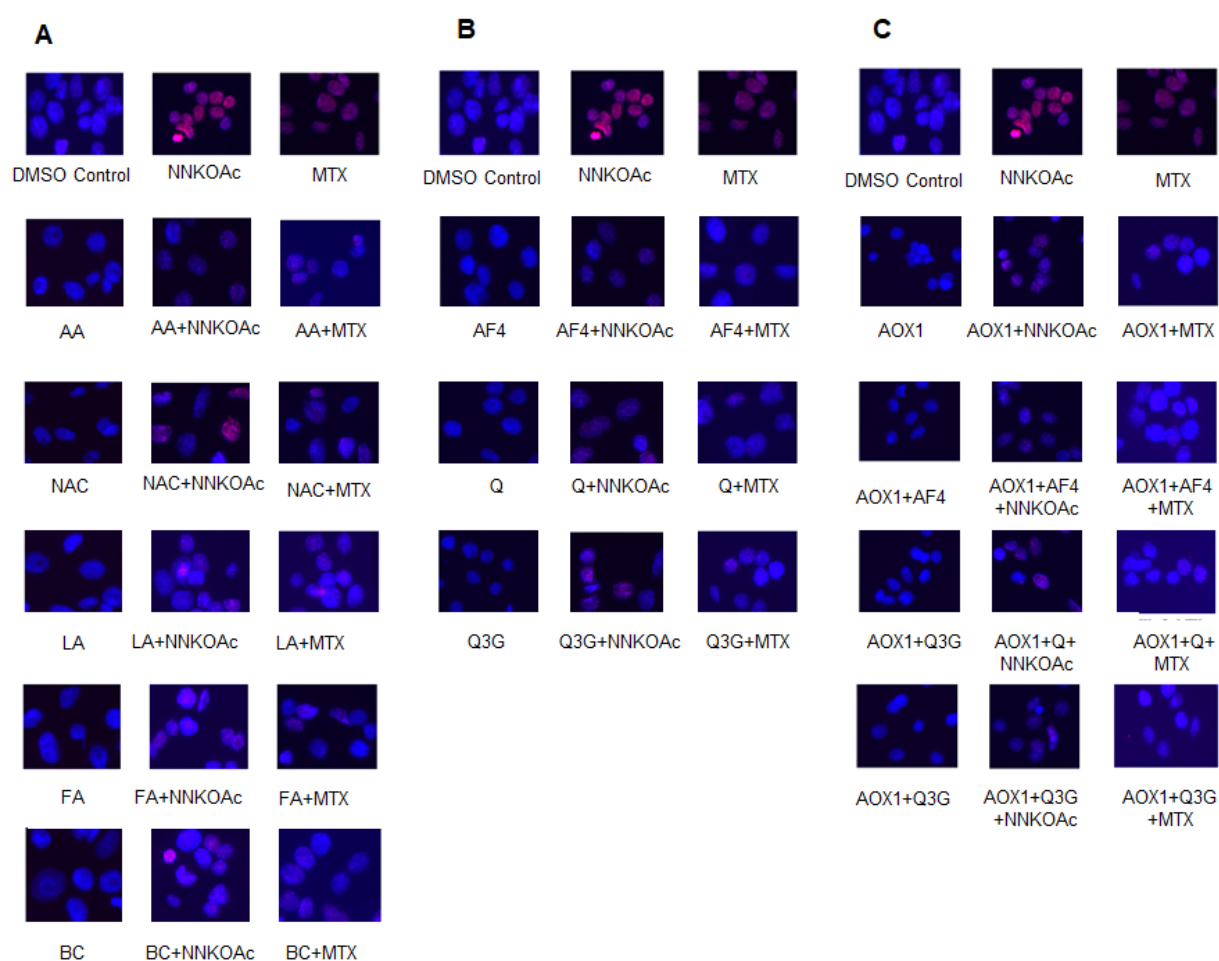

**Figure S2.** (A–C): BEAS-2B cells were exposed to either carcinogens alone or in combination with pretreatment of AOX1 alone and with combination of AF4, Q, and Q3G followed by immunofluorescence staining with  $\gamma$ -H2AX antibody and were captured by epifluorescence microscopy at 100x magnification. Nuclei were stained as blue and  $\gamma$ -H2AX foci (S 139) appeared as red. The image shown represents cells from three independent experiments. Abbreviation; AA: Ascorbic acid, AF4: apple peel flavonoid fraction 4, AOX1: antioxidant formulation, BC:  $\beta$ -carotene, FA: folic acid, LA:  $\alpha$ -lipoic acid, MTX: methotrexate, NAC: N-acetyl cysteine, NNKOAc: 4-[(Acetoxymethyl)nitrosamino]-1-(3-pyridyl)-1-butanone, Q: quercetin, Q3G: Q-3-O-d-glucoside (Q3G).

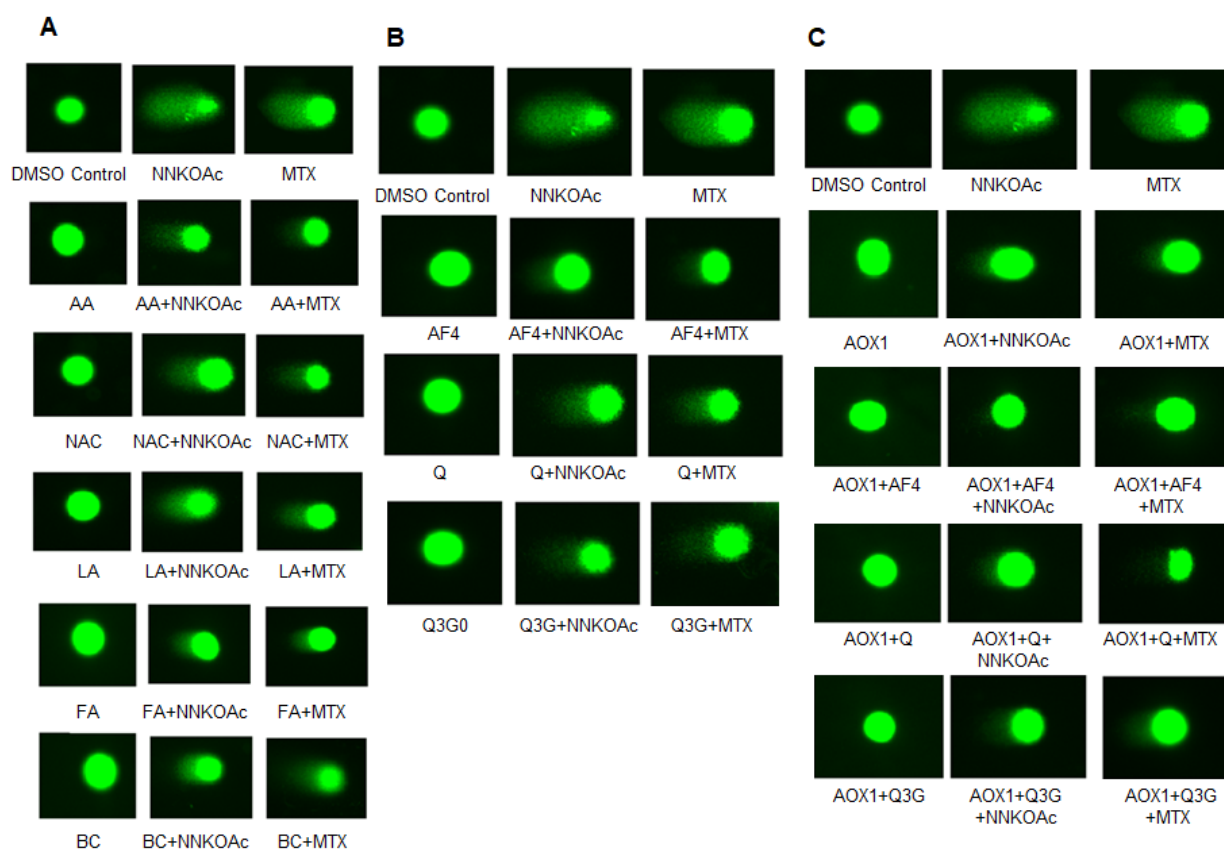

**Figure S3.** (A–C): DNA tail damage in BEAS-2B cells exposed to either carcinogen alone or in combination with pretreatment of AOX1 alone and with the combination of AF4, Q, Q3G, as assessed by comet assay. Abbreviation; AA: Ascorbic acid, AF4: apple peel flavonoid fraction 4, AOX1: antioxidant formulation, BC:  $\beta$ -carotene, FA: folic acid, LA:  $\alpha$ -lipoic acid, MTX: methotrexate, NAC: N-acetyl cysteine, NNKOAc: 4-[(Acetoxymethyl)nitrosamino]-1-(3-pyridyl)-1-butanone, Q: quercetin, Q3G: Q-3-O-d-glucoside (Q3G).
